# Supplementary material
Source: PubMed Central journal article supplement (PMC4201349)
Supplement: cb500409y_si_001.pdf [file cb500409y_si_001.pdf]

## Supporting Materials

Labeled EF-Tus for rapid kinetic studies of pre-translocation complex formation

Wei Liu<sup>†</sup>, Darius Kavaliauskas<sup>‡,#</sup>, Jared M. Schrader<sup>§,#</sup>, Kiran Poruri<sup>||,#</sup>, Victoria Birkedal<sup>⊥</sup>,  
Emanuel Goldman<sup>||</sup>, Hieronim Jakubowski<sup>||</sup>, Wlodek Mandecki<sup>||</sup>, Olke C. Uhlenbeck<sup>§</sup>,  
Charlotte R. Knudsen<sup>‡</sup>, Yale E. Goldman<sup>¶</sup>, and Barry S. Cooperman<sup>†,\*</sup>

<sup>†</sup> Department of Chemistry, University of Pennsylvania, Philadelphia, PA 19104, United States

<sup>‡</sup> Department of Molecular Biology and Genetics, Aarhus University, DK-8000 Aarhus C, Denmark

<sup>§</sup> Department of Molecular Biosciences, Northwestern University, Evanston, IL 60208, United States

<sup>||</sup> Department of Microbiology and Molecular Genetics, Rutgers University – New Jersey Medical School, Newark, NJ 07101, United States

<sup>⊥</sup> Interdisciplinary Nanoscience Center, Aarhus University, DK-8000 Aarhus C, Denmark

<sup>¶</sup> Pennsylvania Muscle Institute, School of Medicine, University of Pennsylvania, Philadelphia, PA 19104, United States

**Calculations of FRET efficiency within TCs.** For the calculations below, the simplifying assumptions are made that 1) the fluorescence of Phe-tRNA<sup>Phe</sup>(Cy3) and tRNA<sup>Phe</sup>(Cy3) are equal (Supplementary Figure S2a); and 2) that unlabeled EF-Tu<sup>AV</sup> and EF-Tu<sup>AV-Cy5</sup> bind equally well to Phe-tRNA<sup>Phe</sup>(Cy3) (Supplementary Figure S2b).

**TC<sup>QSY9/Cy3</sup> FRET efficiency** (Supplementary Figure S2a). The FRET efficiency within TC<sup>QSY9/Cy3</sup> was calculated from the fluorescence measurements presented in Supplementary Figure S2a, by comparing the Cy3 fluorescence for the same concentration of Phe-tRNA<sup>Phe</sup>(Cy3) present in the TC and free in solution. The eluted TC fraction contained a total of 0.050  $\mu$ M Phe-tRNA<sup>Phe</sup>(Cy3). Based on the radioactivity found in the fractions immediately before and after the eluted TC, about 22% (0.012  $\mu$ M) of Phe-tRNA<sup>Phe</sup>(Cy3) dissociated and was present in the unbound form, so that the fraction contained 0.038  $\mu$ M TC. Because the Phe-tRNA<sup>Phe</sup>(Cy3) preparation was 61 % charged, the unbound [<sup>3</sup>H]-Phe-tRNA<sup>Phe</sup>(Cy3) solution containing 0.050  $\mu$ M [<sup>3</sup>H]-Phe-tRNA<sup>Phe</sup>(Cy3) also contains 0.032  $\mu$ M tRNA<sup>Phe</sup>(Cy3), giving a total Cy3 concentration of 0.082  $\mu$ M. Accordingly, the corrected free Phe-tRNA<sup>Phe</sup>(Cy3) fluorescence is 0.46 of the measured value. Similarly, the corrected fluorescence value for the TC sample was obtained by subtracting the contribution of the 0.012  $\mu$ M free Phe-tRNA<sup>Phe</sup>(Cy3) that was present, giving a corrected value that was 0.55 of the measured value. The calculated FRET efficiency is 66%.

**TC<sup>AV-Cy5/Cy3</sup> FRET efficiency** (Supplementary Figure S2b). The results obtained show that a 4-fold excess of added EF-Tu.GTP suffices to convert all of Phe-tRNA<sup>Phe</sup>(Cy3) into a TC. Two corrections to the results obtained were needed to calculate FRET efficiency. First, the contribution of uncharged tRNA<sup>Phe</sup>(Cy3) fluorescence, which should be unaffected by EF-Tu.GTP addition, is subtracted from each of the traces. As the Phe-tRNA<sup>Phe</sup>(Cy3) preparation used in this experiment was 46% charged, this amounts to subtraction of 54% of the Cy3 fluorescence measured for the sample in the absence of EF-Tu. Second, the EF-Tu<sup>AV-Cy5</sup> sample employed had a labeling stoichiometry of 0.85 so that the FRET efficiency resulting from the first correction was increased by 1/0.85, giving a final value of 76%.

**Supplementary Table 1. Labeling stoichiometries of EF-Tu variants<sup>a</sup>.**

| <b>EF-Tu variant</b> | <b>Label/EF-Tu</b>  |
|----------------------|---------------------|
| wt                   | 0.5 QSY9<br>0.8 Cy3 |
| E348C                | 1.5 QSY9<br>1.5 Cy3 |
| C137A/C255V          | 0.2 Cy5             |
| C137A/C255V/E348C    | 0.9 Cy5             |

<sup>a</sup>Labeling conditions as described in Experimental.

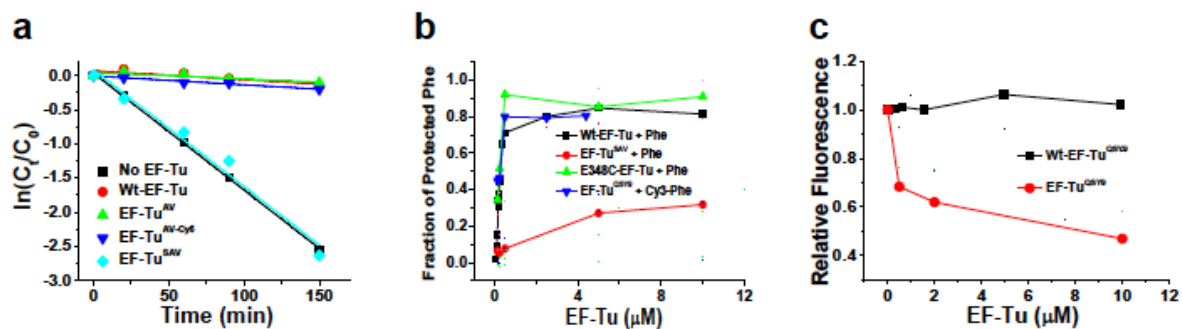

**Supplementary Figure S1.** Characterization of ternary complexes (TCs) formed by labeled EF-Tus. (a) Protection against spontaneous deacylation of [ $^{14}$ C]-Phe-tRNA<sup>Phe</sup> by the indicated EF-Tu variants.  $C_t$  and  $C_0$  denote the concentrations of TC at times  $t$  and zero, respectively. (b) Protection of [ $^3$ H]-Phe-tRNA<sup>Phe</sup> or [ $^3$ H]-Phe-tRNA<sup>Phe</sup> (Cy3) (0.10 - 0.15  $\mu$ M) from RNase A hydrolysis by the indicated EF-Tu variants. (c) Quenching of the fluorescence of Phe-tRNA<sup>Phe</sup> (Cy3), 0.17  $\mu$ M, by EF-Tu<sup>QSY9</sup> or wt-EF-Tu<sup>QSY9</sup>. The relatively high residual fluorescence at 10  $\mu$ M EF-Tu is due to the presence of uncharged tRNA<sup>Phe</sup> (Cy3).

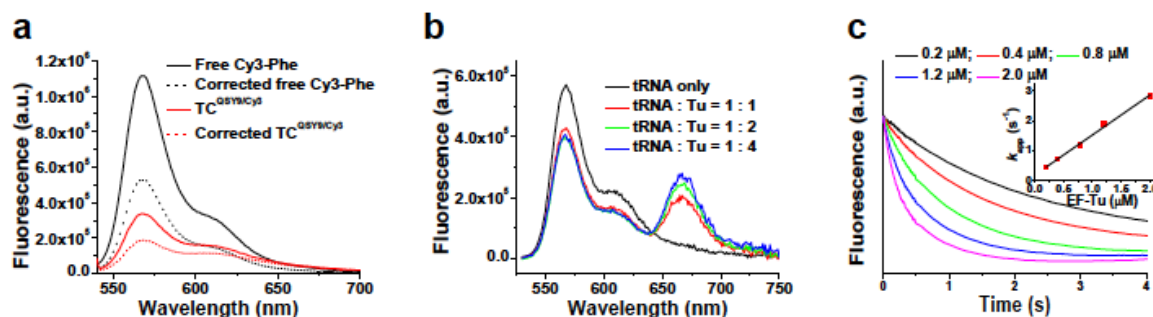

**Supplementary Figure S2.** FRET in TCs formed from labeled E348C-EF-Tu variants and Phe-tRNA<sup>Phe</sup>(Cy3). (a) Quenching of the fluorescence of Phe-tRNA<sup>Phe</sup>(Cy3) by EF-Tu<sup>QSY9</sup> in a purified TC. The solid lines are observed traces at the same concentration of [<sup>3</sup>H]-Phe-tRNA<sup>Phe</sup>(Cy3), as measured by [<sup>3</sup>H]-Phe, in the absence of EF-Tu (black) and for purified TC (red). The dotted lines are corrected traces that permit a FRET efficiency calculation of 66% (see Supplementary Material). (b) FRET between Phe-tRNA<sup>Phe</sup>(Cy3) (0.1 μM) and EF-Tu<sup>AV-Cy5</sup>, added at various ratios without purification of TC. A FRET efficiency of 76% was calculated (see Supplementary Material). (c) Kinetics of quenching of Phe-tRNA<sup>Phe</sup>(Cy3) (0.1 μM) fluorescence following rapid mixing with various concentrations of EF-Tu<sup>QSY9</sup>. A plot of  $k_{app}$  vs. EF-Tu gives a  $k_{on}$  value of  $1.3 \pm 0.1 \mu\text{M}^{-1}\text{s}^{-1}$ .

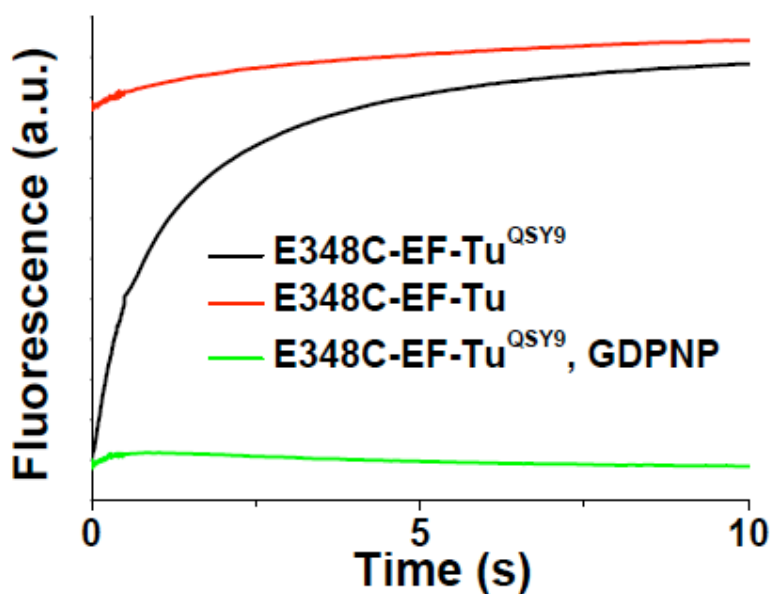

**Supplementary Figure S3.** Complete loss of fluorescence quenching due to FRET on rapid mixing of TC<sup>QSY9/Cy3</sup> (0.1  $\mu$ M) and 70SIC (0.4  $\mu$ M) in a stopped-flow spectrofluorometer, as shown by an increase in Cy3 fluorescence (black) on EF-Tu release from the ribosome. The red trace is a control showing that rapid mixing of TC<sup>Cy3</sup> (0.1  $\mu$ M) and 70SIC (0.4  $\mu$ M), for which there is no FRET, gives a nearly constant fluorescence equal to the final fluorescence seen in the black trace. The green trace is for rapid mixing of TC<sup>QSY9/Cy3</sup> (0.1  $\mu$ M) and 70SIC (0.4  $\mu$ M) when GDPNP replaces GTP. This substitution blocks EF-Tu release, so the FRET interaction is maintained.

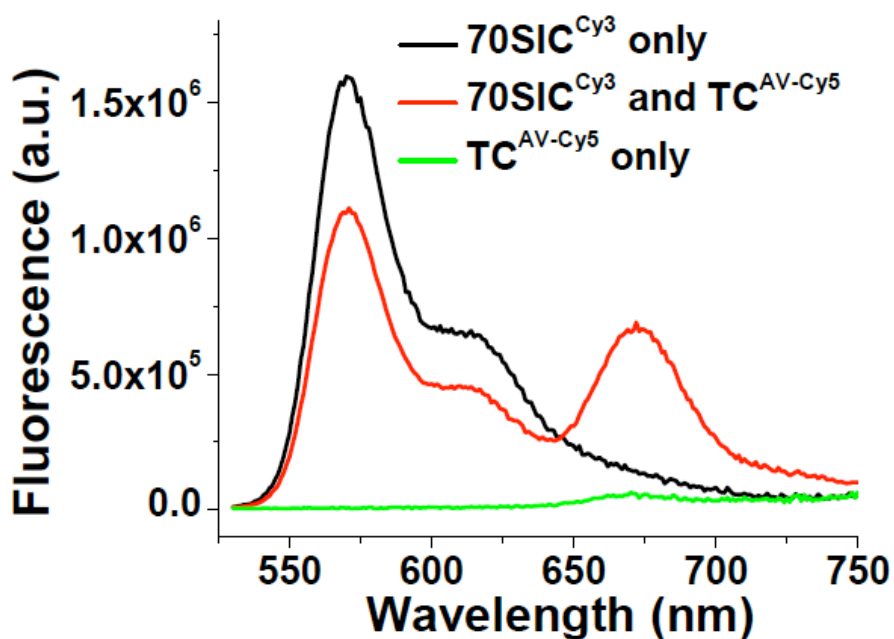

**Supplementary Figure S4.** Fluorescence spectrum resulting from addition of TC<sup>AV-Cy5</sup> (0.2  $\mu$ M) to 70SIC<sup>Cy3</sup> (0.1  $\mu$ M) in the presence of GDPNP (1 mM), giving a stalled complex with EF-Tu bound in the A/T site.<sup>31</sup> Concentrations are final. The labeling stoichiometries were EF-Tu (0.85); L11 (0.80). The FRET efficiency (0.55) corresponds to a Cy3-Cy5 distance of 58 Å, calculated according to the Förster equation {dye:dye distance =  $R_0 [(1/E)-1]^{1/6}$ },<sup>27</sup> assuming an  $R_0$  of 60 Å and that both dyes rotate freely, i.e.,  $\kappa^2$  is equal to 0.67.

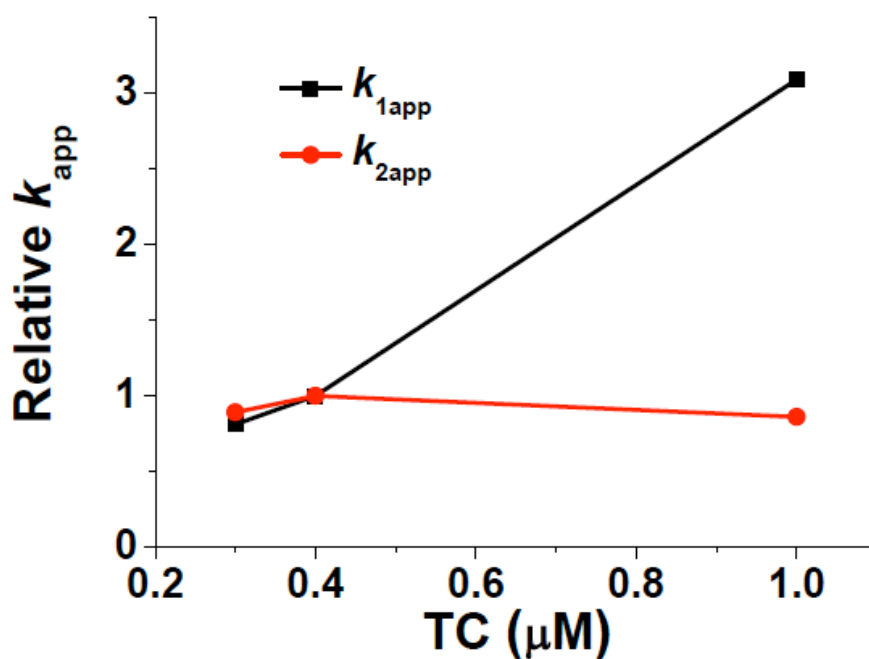

**Supplementary Figure S5.** Dependence of the apparent rate constants,  $k_{1app}$  and  $k_{2app}$  (equation 1), measuring changes in 70SIC<sup>Cy3</sup> (0.1 μM) fluorescence (see Figure 5d, Tu-L11 assay), on rapid mixing with varying concentrations of the TC formed from EF-Tu<sup>QSY9</sup>·GTP and the Val-tRNA<sup>Val2B</sup> T1 variant. Values are normalized to those found at 0.4 μM TC. The linear dependence ( $k_{1app}$ ) and lack of dependence ( $k_{2app}$ ) on TC concentration are consistent with Scheme 1.
